# Supplementary material
Source: PubMed Central journal article supplement (PMC4284600)
Supplement: pnas.201415607SI.pdf [file pnas.201415607SI.pdf]

# Supporting Information

Zhang et al. 10.1073/pnas.1415607112

## SI Materials and Methods

**Western Blot Analysis.** Western blot analysis was performed as previously described (1). The antibodies used in this study were as follows: anti-p53(1C12) (Cell signaling), anti-actin (Sigma), and anti-phospho-Histone H2A.X (Ser139) (Millipore).

**RNA Isolation and RT-PCR Analysis.** The RT-PCR analysis was performed as previously described (2). Briefly, total RNA was isolated and then subjected to cDNA synthesis using M-MLV reverse transcriptase (Promega). The PCR program used for amplification was (i) 94 °C for 5 min, (ii) 94 °C for 45 s, (iii) 58 °C for 45 s, (iv) 72 °C for 1 min, and (v) 72 °C for 10 min. From steps ii–iv, the cycle was repeated 20 times for actin or 28 times for RBM38. The primers for *RBM38* were a forward primer, 5'-GCA CGG CTC ACA GAA GGA-3', and a reverse primer, 5'-CGA GGA CAG TGA CGG GAC A-3'. The primers for mouse actin were a forward primer, 5'-CCC ATC TAC GAG GGC TAT-3', and a reverse primer, 5'-AGA AGG AAG GCT GGA AAA-3'. The primers for *IL17D* were a forward primer, 5'-ACA AGT CTG GAA AGC ATC ACG-3' and a reverse primer, 5'-GTG GTG GAA GGC GCT GA-3'. The primers for *Tnfsf15* were a forward primer, 5'- CCT GCT GCC TGT TGT CAT TT-3', and a reverse primer, 5'-GCT GTG GTG AAG GCT CAG ATC T-3'. The primers for *TLR7* were a forward primer, 5'-AAT ATC CCA GAG GCC CAT GT-3', and a reverse primer, 5'-TTG GAC CCC AGT AGA ACA GG-3'. The primers for *GAPDH* were a forward primer, 5'- CCC AGC CTC AAG ATC ATC AGC AAT G -3', and a reverse primer, 5'- ATG GAC TGT GGT CAT GAG TCC TT-3'. The primers for *p16* were a forward primer, 5'- CCC AAC GCC CCG AAC T-3', and a reverse primer, 5' CAG AAG AGC TGC TAC GTG AA-3'.

**SA- $\beta$ -Gal Staining.** This assay was performed as described previously (3). Briefly, tissues were fixed with 2% (vol/vol) formaldehyde and

0.2% glutaraldehyde for 20 min at room temperature, followed by staining with fresh  $\beta$ -gal staining solution overnight at 37 °C.

**Micro-CT Scan.** A custom-built micro-CT imaging system was used for the study (4). Mice were anesthetized with isoflurane in an induction chamber [1.5–3% (vol/vol) isoflurane]. The anesthetized mice were placed in the imaging instrument and fitted with a nose cone connected to a vaporizer, to maintain isoflurane (1.0–2.5%) during the procedure.

**Histological Analysis.** Mouse tissues were fixed in 10% (wt/vol) neutral buffered formalin, routinely processed, and embedded in paraffin blocks. Tissue sections (5  $\mu$ m) were sectioned and stained with H&E or periodic acid–Schiff (PAS). For immunohistochemistry (IHC) analysis, tissues were stained with B220, CD3, or F4/80 antibody using the Vectastain ABC Elite Kit (Vector Laboratories). Briefly, tissue sections (5  $\mu$ m) were dewaxed and antigen-retrieved in a citrate buffer (pH 6.0), followed by incubation with a primary antibody overnight at 4 °C and then a secondary antibody for 1 h at room temperature. The slides were visualized by treatment with 3,3'-diaminobenzidine tetrahydrochloride (DAB), and then counterstained with Mayer's hematoxylin.

**Irradiation of Mice.** At 6–8 wk of age, mice with various genotypes were irradiated with  $\gamma$  rays from a  $^{137}\text{Cs}$  source (6.04 gray/min) at a dose of 4 or 8 gray. Mice exposed to 8 gray of  $\gamma$ -irradiation were monitored daily. For mice exposed with 4 gray of  $\gamma$ -irradiation, tissues were collected 4 h postirradiation and subjected to Western blot analysis.

**Statistical Analysis.** Fisher's exact test was used for comparison between tumor penetrance from different genotypes. The log-rank test was used to determine the differences in survival of different genotypes. A *P* value of 0.05 was considered significant.

1. Dohn M, Zhang S, Chen X (2001) p63alpha and DeltaNp63alpha can induce cell cycle arrest and apoptosis and differentially regulate p53 target genes. *Oncogene* 20(25):3193–3205.
2. Zhang J, Chen X (2007) DeltaNp73 modulates nerve growth factor-mediated neuronal differentiation through repression of TrkA. *Mol Cell Biol* 27(10):3868–3880.

3. Zhang J, et al. (2011) Translational repression of p53 by RNPC1, a p53 target overexpressed in lymphomas. *Genes Dev* 25(14):1528–1543.
4. Liang H, et al. (2007) A microPET/CT system for in vivo small animal imaging. *Phys Med Biol* 52(13):3881–3894.

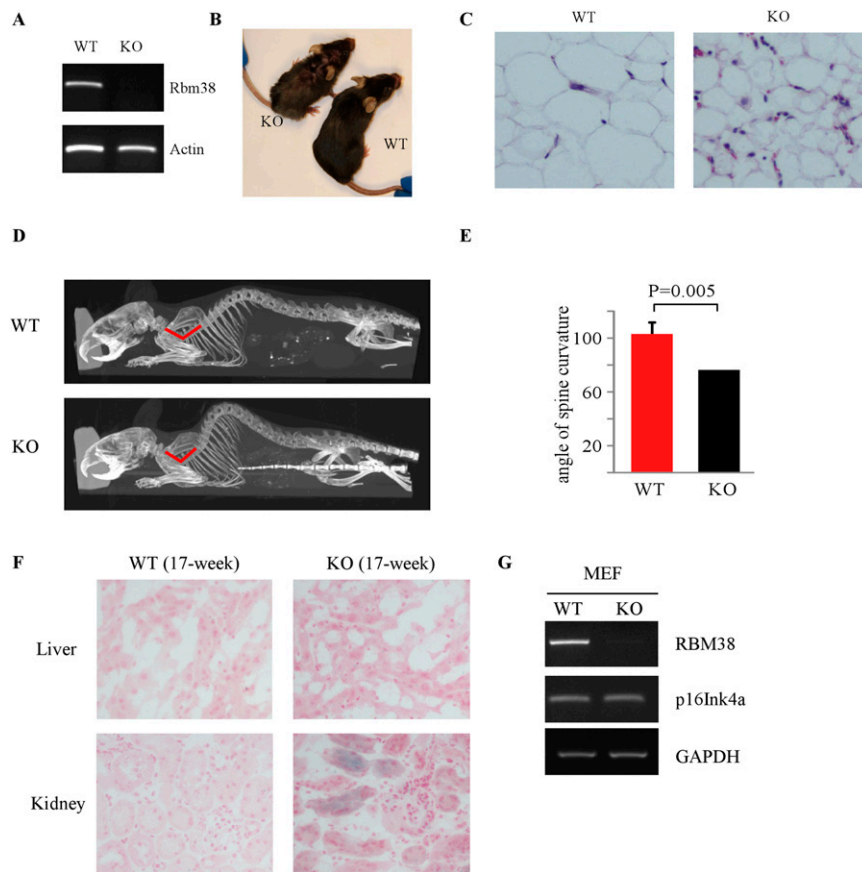

**Fig. S1.** (A) Total RNAs were isolated from WT and *Rbm38*<sup>-/-</sup> MEFs, and the level of Rbm38 and actin mRNA was determined by RT-PCR analysis. (B) Representative photographs of 18-mo-old WT and *Rbm38*<sup>-/-</sup> mice. (C) Representative images of hematoxylin and eosin-stained sections of gonadal adipose tissue from 18-mo-old WT and *Rbm38*<sup>-/-</sup> mice. (D) Representative Micro-CT images from age- and sex-matched WT and *Rbm38*<sup>-/-</sup> mice. *Rbm38*<sup>-/-</sup> mouse displays a pronounced lordokyphosis (curvature of the spine) phenotype. (E) The spinal angle as indicated in E was measured from WT (*n* = 3) and *Rbm38*<sup>-/-</sup> mice (*n* = 4). Bars represent mean ± SD. (F) SA-β-gal staining was performed with fresh-frozen liver and kidney tissues from young (17-wk-old) WT and *Rbm38*<sup>-/-</sup> mice, followed by counterstaining with nuclear fast red. (G) The level of Rbm38, p16Ink4a, and GAPDH transcript was measured in WT and *Rbm38*<sup>-/-</sup> MEFs.

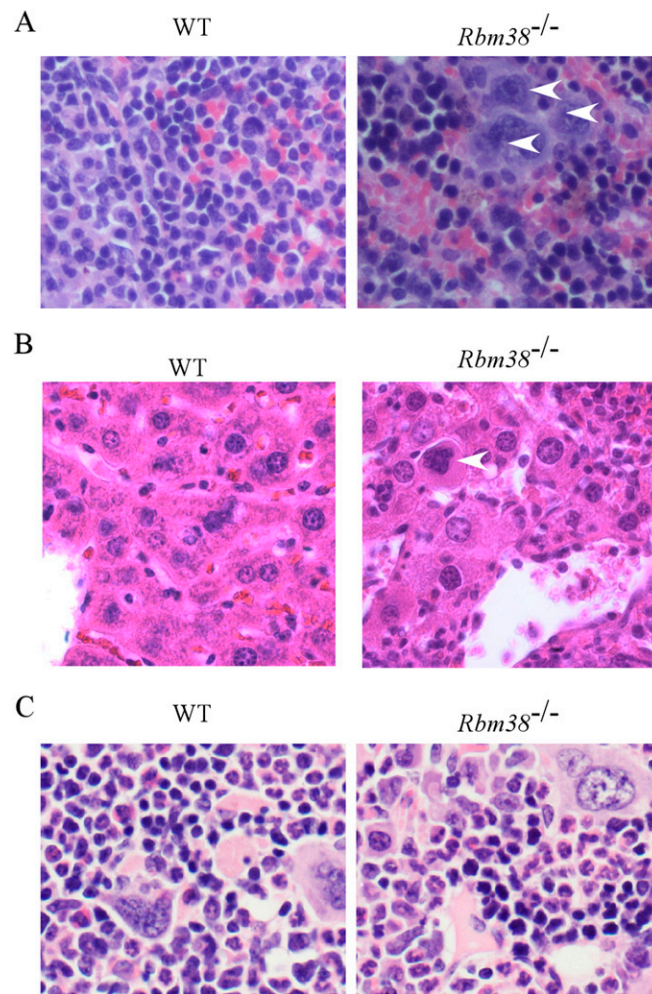

**Fig. S2.** (A) Representative images of hematoxylin and eosin-stained sections of spleens from WT and *Rbm38*<sup>-/-</sup> mice. The arrows indicate megakaryocytes. (B) Representative images of hematoxylin and eosin-stained sections of livers from WT and *Rbm38*<sup>-/-</sup> mice. The arrow indicates a megakaryocyte. (C) Representative images of hematoxylin and eosin-stained sections of bone marrows from WT and *Rbm38*<sup>-/-</sup> mice.

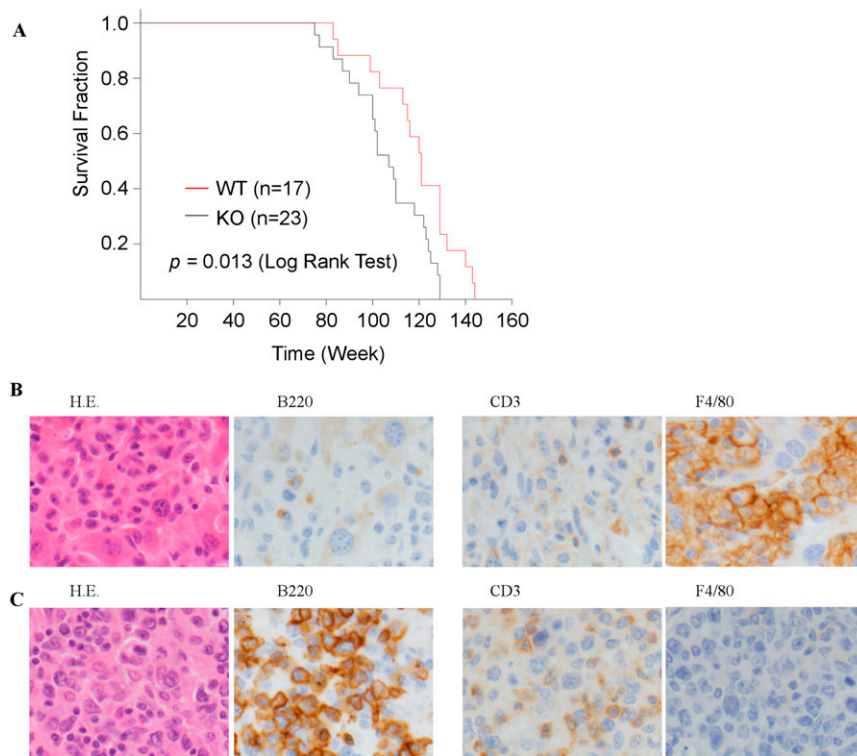

**Fig. S3.** (A) Kaplan–Meyer survival curves of WT ( $n = 17$ ) and  $Rbm38^{-/-}$  ( $n = 23$ ) mice. The median survival time is 121 wk for WT mice and 107 wk for  $Rbm38^{-/-}$  mice ( $P = 0.013$  by log-rank test). (B) Representative hematoxylin and eosin-, B220-, CD3-, and F4/80-stained histiocytic sarcoma in the liver of an  $Rbm38^{-/-}$  mouse. (C) Representative hematoxylin and eosin-, B220-, CD3-, and F4/80-stained lymphoma in the liver of an  $Rbm38^{-/-}$  mouse.

**Table S1. WT mice: Survival time, tumor spectrum, and EMH**

| ID      | Genotype | Survival, wk | Tumor               | EMH           |
|---------|----------|--------------|---------------------|---------------|
| 1-24-2  | WT       | 83           | No                  | No            |
| 2-15-2  | WT       | 140          | Lymphoma            | Liver         |
| 2-19-6  | WT       | 132          | No                  | Spleen        |
| 2-19-2  | WT       | 143          | No                  | Spleen        |
| 3-11-3  | WT       | 129          | No                  | No            |
| 3-28-5  | WT       | 85           | No                  | Spleen        |
| 3-9-7   | WT       | 129          | No                  | No            |
| 5-12-3  | WT       | 99           | Lymphoma            | Spleen        |
| 7-9-9   | WT       | 116          | No                  | No            |
| 8-2-6   | WT       | 120          | No                  | No            |
| 10-24-7 | WT       | 130          | No                  | Spleen        |
| 10-26-6 | WT       | 129          | Histiocytic sarcoma | Liver, spleen |
| 11-10-7 | WT       | 121          | No                  | No            |
| 11-7-3  | WT       | 121          | No                  | No            |
| 11-29-2 | WT       | 144          | No                  | Spleen        |
| 12-2-4  | WT       | 113          | No                  | No            |
| 12-20-7 | WT       | 115          | No                  | Spleen        |

EMH, extramedullary hematopoiesis.

**Table S2. *Rbm38*<sup>-/-</sup> mice: Survival time, tumor spectrum, and EMH**

| ID       | Genotype                    | Survival, wk | Tumor                        | EMH           |
|----------|-----------------------------|--------------|------------------------------|---------------|
| 1-12-2   | <i>RBM38</i> <sup>-/-</sup> | 100          | Lymphoma                     | Spleen        |
| 1-24-5   | <i>RBM38</i> <sup>-/-</sup> | 83           | No                           | No            |
| 1-11-3   | <i>RBM38</i> <sup>-/-</sup> | 100          | No                           | No            |
| 1-11-14  | <i>RBM38</i> <sup>-/-</sup> | 110          | Histiocytic sarcoma          | Spleen        |
| 2-14-2   | <i>RBM38</i> <sup>-/-</sup> | 109          | No                           | Spleen        |
| 2-14-3   | <i>RBM38</i> <sup>-/-</sup> | 101          | No                           | Spleen        |
| 2-25-1   | <i>RBM38</i> <sup>-/-</sup> | 107          | Lymphoma                     | Spleen        |
| 3-7-2    | <i>RBM38</i> <sup>-/-</sup> | 101          | Lymphoma                     | Spleen        |
| 3-7-5    | <i>RBM38</i> <sup>-/-</sup> | 129          | Lymphoma                     | Liver         |
| 3-7-4    | <i>RBM38</i> <sup>-/-</sup> | 129          | Hepatoma                     | Spleen        |
| 6-15-3   | <i>RBM38</i> <sup>-/-</sup> | 90           | No                           | Spleen, liver |
| 8-2-3    | <i>RBM38</i> <sup>-/-</sup> | 94           | No                           | Spleen        |
| 9-30-4   | <i>RBM38</i> <sup>-/-</sup> | 102          | Hemangiosarcoma              | Spleen, liver |
| 10-26-3  | <i>RBM38</i> <sup>-/-</sup> | 75           | No                           | Spleen        |
| 11-3-14  | <i>RBM38</i> <sup>-/-</sup> | 77           | No                           | Spleen        |
| 11-10-10 | <i>RBM38</i> <sup>-/-</sup> | 124          | Lymphoma and hemangiosarcoma | Spleen, liver |
| 11-16-14 | <i>RBM38</i> <sup>-/-</sup> | 128          | No                           | Spleen, liver |
| 11-16-7  | <i>RBM38</i> <sup>-/-</sup> | 125          | Hepatoma and lymphoma        | Spleen        |
| 12-19-3  | <i>RBM38</i> <sup>-/-</sup> | 123          | Lymphoma                     | Spleen        |
| 12-19-8  | <i>RBM38</i> <sup>-/-</sup> | 118          | Hepatoma                     | Spleen, liver |
| 12-19-6  | <i>RBM38</i> <sup>-/-</sup> | 87           | No                           | No            |
| 12-24-2  | <i>RBM38</i> <sup>-/-</sup> | 122          | No                           | No            |
| 12-28-5  | <i>RBM38</i> <sup>-/-</sup> | 102          | Hepatoma and lymphoma        | Spleen        |

EMH, extramedullary hematopoiesis.

**Table S3. Tumor spectrum of *p53*<sup>+/-</sup> and *Rbm38*<sup>-/-</sup>; *p53*<sup>+/-</sup> mice**

| Tumors                        | <i>p53</i> <sup>+/-</sup> (n = 24) | <i>Rbm38</i> <sup>-/-</sup> ; <i>p53</i> <sup>+/-</sup> (n = 21) |
|-------------------------------|------------------------------------|------------------------------------------------------------------|
| Lymphoma                      |                                    |                                                                  |
| Thymic T-cell lymphoma        | 2                                  | 0                                                                |
| Diffuse large B-cell lymphoma | 3                                  | 2                                                                |
| Unclassified                  | 4                                  | 1                                                                |
| Sarcoma                       |                                    |                                                                  |
| Osteosarcoma                  | 4                                  | 3                                                                |
| Liposarcoma                   | 3                                  | 0                                                                |
| Fibrosarcoma                  | 5                                  | 0                                                                |
| Angiosarcoma                  | 0                                  | 2                                                                |
| Granulocytic sarcoma          | 0                                  | 3                                                                |
| Rhabdomyosarcoma              | 0                                  | 1                                                                |
| Carcinoma                     |                                    |                                                                  |
| Squamous cell carcinoma       | 3                                  | 1                                                                |
| Adenocarcinoma                | 1                                  | 1                                                                |
| Hepatocellular carcinoma      | 1                                  | 0                                                                |
| Endometrial carcinoma         | 0                                  | 1                                                                |
| Total tumors                  | 26                                 | 15                                                               |

**Table S4.  $p53^{+/-}$  mice: Survival time and tumor spectrum**

| ID     | Genotype    | Survival, wk | Tumor                             |
|--------|-------------|--------------|-----------------------------------|
| 15     | $p53^{+/-}$ | 60           | Adenocarcinoma and liposarcoma    |
| 2-1-7  | $p53^{+/-}$ | 97           | Lymphoma                          |
| 85     | $p53^{+/-}$ | 84           | Fibrosarcoma                      |
| 2-1-4  | $p53^{+/-}$ | 62           | Thymic T-cell lymphoma            |
| 1-4-4  | $p53^{+/-}$ | 96           | DLBL and hepatocellular carcinoma |
| 1-9-15 | $p53^{+/-}$ | 31           | Thymic T-cell lymphoma            |
| 2-16   | $p53^{+/-}$ | 91           | Osteosarcoma                      |
| 63     | $p53^{+/-}$ | 62           | Liposarcoma and osteosarcoma      |
| 17     | $p53^{+/-}$ | 61           | Fibrosarcoma                      |
| 61-2   | $p53^{+/-}$ | 68           | Lymphoma                          |
| 24     | $p53^{+/-}$ | 36           | Fibrosarcoma                      |
| 72     | $p53^{+/-}$ | 57           | SCC                               |
| 41     | $p53^{+/-}$ | 33           | Lymphoma                          |
| 1-4-3  | $p53^{+/-}$ | 34           | SCC                               |
| 2-3    | $p53^{+/-}$ | 64           | Fibrosarcoma                      |
| 70     | $p53^{+/-}$ | 68           | Osteosarcoma                      |
| 91     | $p53^{+/-}$ | 74           | Lymphoma                          |
| 68     | $p53^{+/-}$ | 67           | SCC                               |
| 84     | $p53^{+/-}$ | 77           | DLBL                              |
| 2-1-6  | $p53^{+/-}$ | 92           | DLBL                              |
| 53     | $p53^{+/-}$ | 109          | Osteosarcoma                      |
| 18     | $p53^{+/-}$ | 48           | Fibrosarcoma                      |
| 80     | $p53^{+/-}$ | 65           | Liposarcoma                       |
| 19     | $p53^{+/-}$ | 61           | No                                |

DLBL, diffuse large B lymphoma; SCC, squamous-cell carcinoma.

**Table S5.  $RBM38^{-/-}; p53^{+/-}$  mice: Survival time, tumor spectrum, and other abnormalities**

| ID      | Genotype                 | Survival, wk | Tumor                         | Abnormalities in spleen and liver            |
|---------|--------------------------|--------------|-------------------------------|----------------------------------------------|
| 3-1-1   | $RBM38^{-/-}; p53^{+/-}$ | 70           | Granulocytic sarcoma          | Not determined                               |
| 3-1-8   | $RBM38^{-/-}; p53^{+/-}$ | 70           | Granulocytic sarcoma          | Not determined                               |
| 3-1-4   | $RBM38^{-/-}; p53^{+/-}$ | 75           | Liposarcoma                   | Not determined                               |
| 10-23-3 | $RBM38^{-/-}; p53^{+/-}$ | 64           | Angiosarcoma and osteosarcoma | Not determined                               |
| 10-23-2 | $RBM38^{-/-}; p53^{+/-}$ | 82           | Endometrial carcinoma         | Not determined                               |
| 4-13-5  | $RBM38^{-/-}; p53^{+/-}$ | 87           | Osteosarcoma and DLBL         | Not determined                               |
| 10-4-6  | $RBM38^{-/-}; p53^{+/-}$ | 64           | Adenocarcinoma                | Not determined                               |
| 2-27-2  | $RBM38^{-/-}; p53^{+/-}$ | 76           | Angiosarcoma                  | Not determined                               |
| 1-16-4  | $RBM38^{-/-}; p53^{+/-}$ | 65           | Osteosarcoma and lymphoma     | Not determined                               |
| 1-16-5  | $RBM38^{-/-}; p53^{+/-}$ | 68           | Rhabdomyosarcoma              | Not determined                               |
| 10-4-7  | $RBM38^{-/-}; p53^{+/-}$ | 74           | DLBL                          | Not determined                               |
| 12-15-2 | $RBM38^{-/-}; p53^{+/-}$ | 115          | SCC and granulocytic sarcoma  | Not determined                               |
| 11-21-4 | $RBM38^{-/-}; p53^{+/-}$ | 91           | No                            | Splenic follicular hyperplasia               |
| 7-11-13 | $RBM38^{-/-}; p53^{+/-}$ | 52           | No                            | Splenic follicular hyperplasia               |
| 11-21-3 | $RBM38^{-/-}; p53^{+/-}$ | 36           | No                            | Hepatitis                                    |
| 6-13-6  | $RBM38^{-/-}; p53^{+/-}$ | 60           | No                            | No change                                    |
| 6-13-2  | $RBM38^{-/-}; p53^{+/-}$ | 69           | No                            | Steatosis and splenic follicular hyperplasia |
| 9-5-3   | $RBM38^{-/-}; p53^{+/-}$ | 42           | No                            | Steatosis and splenic follicular hyperplasia |
| 10-23-1 | $RBM38^{-/-}; p53^{+/-}$ | 75           | No                            | Steatosis and splenic follicular hyperplasia |
| 10-25-5 | $RBM38^{-/-}; p53^{+/-}$ | 101          | No                            | Splenic follicular hyperplasia               |
| 12-15-4 | $RBM38^{-/-}; p53^{+/-}$ | 75           | No                            | Splenic follicular hyperplasia               |

DLBL, diffused large B lymphoma; SCC, squamous-cell carcinoma.

**Table S6. *p53*<sup>-/-</sup> mice: Survival time and tumor spectrum**

| ID  | Genotype                  | Survival, wk | Tumor                                           |
|-----|---------------------------|--------------|-------------------------------------------------|
| 5   | <i>p53</i> <sup>-/-</sup> | 26           | Angiosarcoma, hibernoma, and lymphoma           |
| 50  | <i>p53</i> <sup>-/-</sup> | 25           | Thymic T-cell lymphoma                          |
| 9   | <i>p53</i> <sup>-/-</sup> | 21           | Thymic T-cell lymphoma                          |
| 42  | <i>p53</i> <sup>-/-</sup> | 30           | Angiosarcoma and osteosarcoma                   |
| 57  | <i>p53</i> <sup>-/-</sup> | 22           | Rhabdomyosarcoma                                |
| 48  | <i>p53</i> <sup>-/-</sup> | 18           | Diffuse large B-cell lymphoma                   |
| 92  | <i>p53</i> <sup>-/-</sup> | 22           | Diffuse large B-cell lymphoma                   |
| 95  | <i>p53</i> <sup>-/-</sup> | 20           | Lymphoma                                        |
| 52  | <i>p53</i> <sup>-/-</sup> | 29           | Lymphoma                                        |
| 4   | <i>p53</i> <sup>-/-</sup> | 31           | Diffuse large B-cell lymphoma                   |
| 68  | <i>p53</i> <sup>-/-</sup> | 27           | Thymic T-cell lymphoma                          |
| 25  | <i>p53</i> <sup>-/-</sup> | 34           | Histiocytic sarcoma and rhabdomyosarcoma        |
| 3   | <i>p53</i> <sup>-/-</sup> | 26           | Thymic T-cell lymphoma                          |
| 8   | <i>p53</i> <sup>-/-</sup> | 23           | Thymic T-cell lymphoma and hemangioma           |
| 1-1 | <i>p53</i> <sup>-/-</sup> | 22           | Thymic T-cell lymphoma and hemangioma           |
| 1-2 | <i>p53</i> <sup>-/-</sup> | 25           | Thymic T-cell lymphoma and granulocytic sarcoma |
| 2   | <i>p53</i> <sup>-/-</sup> | 22           | Lymphoma                                        |
| 76  | <i>p53</i> <sup>-/-</sup> | 20           | Lymphoma                                        |
| 85  | <i>p53</i> <sup>-/-</sup> | 22           | Thymic T-cell lymphoma and histiocytic sarcoma  |
| 36  | <i>p53</i> <sup>-/-</sup> | 24           | Thymic T-cell lymphoma                          |
| 83  | <i>p53</i> <sup>-/-</sup> | 22           | Rhabdomyosarcoma and histiocytic sarcoma        |
| 9-2 | <i>p53</i> <sup>-/-</sup> | 25           | Diffuse large B-cell lymphoma                   |
| 55  | <i>p53</i> <sup>-/-</sup> | 28           | Thymic T-cell lymphoma                          |
| 19  | <i>p53</i> <sup>-/-</sup> | 29           | Thymic T-cell lymphoma                          |

**Table S7. *RBM38*<sup>-/-</sup>; *p53*<sup>-/-</sup> mice: Survival time and tumor spectrum**

| ID      | Genotype                                                | Survival, wk | Tumor                         |
|---------|---------------------------------------------------------|--------------|-------------------------------|
| 10-1-2  | <i>RBM38</i> <sup>-/-</sup> ; <i>p53</i> <sup>-/-</sup> | 19           | No                            |
| 9-5-16  | <i>RBM38</i> <sup>-/-</sup> ; <i>p53</i> <sup>-/-</sup> | 18           | Thymic T-cell lymphoma        |
| 7-11-5  | <i>RBM38</i> <sup>-/-</sup> ; <i>p53</i> <sup>-/-</sup> | 26           | Lymphoma                      |
| 7-6-3   | <i>RBM38</i> <sup>-/-</sup> ; <i>p53</i> <sup>-/-</sup> | 21           | Thymic T-cell lymphoma        |
| 7-11-2  | <i>RBM38</i> <sup>-/-</sup> ; <i>p53</i> <sup>-/-</sup> | 16           | Thymic T-cell lymphoma        |
| 7-11-1  | <i>RBM38</i> <sup>-/-</sup> ; <i>p53</i> <sup>-/-</sup> | 27           | Thymic T-cell lymphoma        |
| 10-1-1  | <i>RBM38</i> <sup>-/-</sup> ; <i>p53</i> <sup>-/-</sup> | 17           | Thymic T-cell lymphoma        |
| 7-6-10  | <i>RBM38</i> <sup>-/-</sup> ; <i>p53</i> <sup>-/-</sup> | 15           | Thymic T-cell lymphoma        |
| 1-14-4  | <i>RBM38</i> <sup>-/-</sup> ; <i>p53</i> <sup>-/-</sup> | 29           | Diffuse large B-cell lymphoma |
| 4-13-4  | <i>RBM38</i> <sup>-/-</sup> ; <i>p53</i> <sup>-/-</sup> | 28           | Spindle cell sarcoma          |
| 7-6-6   | <i>RBM38</i> <sup>-/-</sup> ; <i>p53</i> <sup>-/-</sup> | 24           | Diffuse large B-cell lymphoma |
| 7-11-4  | <i>RBM38</i> <sup>-/-</sup> ; <i>p53</i> <sup>-/-</sup> | 21           | Diffuse large B-cell lymphoma |
| 3-10-10 | <i>RBM38</i> <sup>-/-</sup> ; <i>p53</i> <sup>-/-</sup> | 19           | Lymphoma                      |
| 12-15-1 | <i>RBM38</i> <sup>-/-</sup> ; <i>p53</i> <sup>-/-</sup> | 19           | Diffuse large B-cell lymphoma |
| 1-14-3  | <i>RBM38</i> <sup>-/-</sup> ; <i>p53</i> <sup>-/-</sup> | 15           | Thymic T-cell lymphoma        |
| 10-1-4  | <i>RBM38</i> <sup>-/-</sup> ; <i>p53</i> <sup>-/-</sup> | 18           | Thymic T-cell lymphoma        |
| 4-13-1  | <i>RBM38</i> <sup>-/-</sup> ; <i>p53</i> <sup>-/-</sup> | 21           | No                            |
| 6-21-8  | <i>RBM38</i> <sup>-/-</sup> ; <i>p53</i> <sup>-/-</sup> | 19           | Thymic T-cell lymphoma        |
| 5-2-9   | <i>RBM38</i> <sup>-/-</sup> ; <i>p53</i> <sup>-/-</sup> | 21           | Thymic T-cell lymphoma        |

**Table S8. Tumor spectrum of  $p53^{-/-}$  and  $Rbm38^{-/-}; p53^{-/-}$  mice**

| Tumors                        | $p53^{-/-}$ (n = 24) | $Rbm38^{-/-}; p53^{-/-}$ (n = 19) |
|-------------------------------|----------------------|-----------------------------------|
| Lymphoma                      |                      |                                   |
| Thymic T-cell lymphoma        | 11                   | 10                                |
| Diffuse large B-cell lymphoma | 4                    | 4                                 |
| Unclassified                  | 5                    | 2                                 |
| Sarcoma                       |                      |                                   |
| Spindle cell sarcoma          | 0                    | 1                                 |
| Rhabdomyosarcoma              | 3                    | 0                                 |
| Histiocytic sarcoma           | 3                    | 0                                 |
| Angiosarcoma                  | 2                    | 0                                 |
| Granulocytic sarcoma          | 1                    | 0                                 |
| Osteosarcoma                  | 1                    | 0                                 |
| Hibernoma                     | 1                    | 0                                 |
| Hemangioma                    | 2                    | 0                                 |
| Total tumors                  | 33                   | 17                                |
| Tumor-free mice               | 0                    | 2                                 |
